# Supplementary material for: Fragment Enrichment of Circulating Tumor DNA With Low-Frequency Mutations
Source: Front Genet. 2020 Feb 28;11:147. doi: 10.3389/fgene.2020.00147 (PMC7059766; doi:10.3389/fgene.2020.00147)
Supplement: Supplementary file 1 [file Table_1.xlsx]

## Sheet: Description
Description	Marked symbol
+ represented the mutation fragment size were less than the wild fragment size	Short
- represented the mutation fragment size were more than the wild fragment size	Long
| represented the mutation fragment size were within the 2 wild fragment sizes	Other
? represented no mutation fragment size	NA
Analysis fragment size range	100~300 bp

## Sheet: Data Statistics
Sample_ID	Raw_reads	Clean_Reads	Ratio	Hotspot-Reads	NGS-Freq	DDPCR	Mutation-Reads-Support	Wild-Reads-Support	Frequency	Description	Mutation-Peak	Wild-Peak	Mutation-Fragment-Median	Wild-Fragment-Median	Mutation-Fragment-Mean	Wild-Fragment-Mean
T790M-sample1	17060706	17059334	0.99992	2802	0.0853315	0.2374	209	2057	0.092233	+	163	165	164.5	166	173.011	170.013
T790M-sample2	18335426	18334155	0.999931	3101	0.101258	0.176009	252	2279	0.0995654	+	144/151	164/170	153	164.5	167.169	167.052
T790M-sample3	24821030	24776298	0.998198	3058	0.260884	0.239	705	1883	0.272411	+	164	173	165.5	171	171.506	175.029
T790M-sample4	25880110	25857103	0.999111	1583	0.0101637	0.0006	2	658	0.0030303	+	142	150	142	163	142	164.337
T790M-sample5	20286212	20285876	0.999983	3563	0.0712678	0.0584	213	2583	0.0761803	+	139/142	152	154	159	161.771	163.599
T790M-sample6	18027442	18027326	0.999994	2832	0.0106092	0.0084	35	2360	0.0146138	+	150	169	155	168.5	175.697	175.618
T790M-sample7	8747060	8746971	0.99999	2097	0.0575772	0.0442	101	1662	0.0572887	-	167	164	160	167	167.103	170.067
T790M-sample8	17388912	17388461	0.999974	1857	0.00107759	0.0005	1	960	0.00104058	+	155	168	155	169	155	174.575
T790M-sample9	8897736	8897686	0.999994	1852	0.00892857	0.0105	1	790	0.00126422	+	160	138/164	160	167	160	168.802
T790M-sample10	6471492	6471474	0.999997	1805	0.00443459	0.0063	8	1459	0.00545331	-	176/179/186	167	178.5	171	177.5	174.568
T790M-sample11	5414922	5414910	0.999998	6939	0.747513	0.6933	4555	1463	0.756896	+	146	171	164	172	176.126	176.76
T790M-sample12	5391450	5391423	0.999995	1979	0.00509424	0.0037	10	1695	0.0058651	+	144	165	156	170	178.9	173.189
T790M-sample13	8567490	8567428	0.999993	2196	0.0127505	0.0148	24	1872	0.0126582	|	143/148/153/155/160/167/171/183/207	165	166.5	168	170.636	172.417
T790M-sample14	6578664	6578654	0.999998	2273	0.00737207	0.0074	16	1799	0.00881543	+	151	165	151	168	153.067	171.833
T790M-sample15	6870100	6870023	0.999989	3539	0.157143	0.1703	475	2271	0.172979	+	152	165	165	167	177.793	177.991
T790M-sample16	4410586	4410579	0.999998	1533	0.00131062	0.0006	1	1192	0.000838223	-	328	168	0	169	0	173.053
T790M-sample17	10006970	10006927	0.999996	2558	0.00535783	0.0038	11	2115	0.00517404	-	173	169	169	168	162.182	173.709
T790M-sample18	6032620	6032590	0.999995	1430	0.00143472	0.0007	2	1129	0.00176835	+	161	168	161	172	161	175.862
T790M-sample19	4302744	4302729	0.999997	1742	0.00176471	0.001	3	1493	0.00200535	-	205	164/168	205	170	186.667	175.967
T790M-sample20	6311558	6311519	0.999994	1975	0.00151439	0.0006	2	1720	0.00116144	-	188	169	188	167	188	167.489
T790M-sample21	6809012	6808999	0.999998	2112	0.00137931	0.0017	1	893	0.00111857	+	160	172	160	168	160	171.251
T790M-sample22	5669942	5669814	0.999977	2267	0.00689655	0.0065	17	1565	0.0107459	+	150	171	158	166	165.188	166.79
T790M-sample23	5665696	5665572	0.999978	2059	0.0779857	0.0432	113	1318	0.0789658	+	132/150	170	141	165	141.36	166.597
T790M-sample24	7327702	7327614	0.999988	2554	0.313216	0.2539	96	808	0.106195	|	163/171	167	163	171	167.974	174.93
T790M-sample25	6490456	6490436	0.999997	1787	0.00109649	0.0005	2	1501	0.00133067	-	179/307	168	179	170	179	172.777
T790M-sample26	19851540	19851423	0.999994	1712	0.00168445	0.0031	3	1489	0.00201072	+	163	165/169	163	168	163	170.948
T790M-sample27	9331626	9331586	0.999996	2307	0.00215239	0.0026	7	1030	0.00675024	|	158/191	169	191	168	209	172.467
T790M-sample28	6589122	6589098	0.999996	1917	0.00941423	0.0062	17	1636	0.0102843	|	147/154/158/162/164/175/190/206	167	164	170	172.941	174.823
T790M-sample29	6940180	6940170	0.999999	6574	0.0145833	0.0104	14	1113	0.0124224	+	124/125/148	166	158	168	156.308	175.86
T790M-sample30	5373590	5373571	0.999996	3380	0.445446	0.3588	1337	1589	0.456938	+	144	169	157	169	171.847	175.096
T790M-sample31	6714334	6714274	0.999991	2584	0.0784158	0.0611	196	2029	0.0880899	+	156	164	167	168	173.751	172.481
T790M-sample32	9590464	9590424	0.999996	3499	0.0457308	0.0555	129	2774	0.0444368	-	169/171	165	169.5	169	178.664	176.258
L858R-sample1	8718140	8718068	0.999992	2100	0.0307988	0.0226876	57	1797	0.0307443	|	135/140/174	166	151	172	159.962	175.704
L858R-sample2	8780726	8780714	0.999999	1547	0.00384862	0.00686977	5	1354	0.00367918	|	168/175	171	171.5	169	171.5	170.553
L858R-sample3	7261588	7261545	0.999994	1988	0.00206612	0.00179677	5	1668	0.00298864	+	140/171	171	154	171	155.2	174.662
L858R-sample4	8096552	8096529	0.999997	1776	0.00764256	0.0186916	14	1528	0.00907912	-	290	166	286.5	171	259.6	174.113
L858R-sample5	10281124	10281096	0.999997	2355	0.0111458	0.0140056	23	1921	0.0118313	+	164	166/173	167	172	173.95	176.141
L858R-sample6	5919978	5919956	0.999996	2623	0.0137763	0.0152801	37	2205	0.0165031	-	303	176	164	176	170.435	181.161
L858R-sample7	10893072	10892969	0.999991	1576	0.00197109	0.000550156	3	1318	0.00227101	-	168	166	168	174.5	201.333	177.716
L858R-sample8	7710672	7710583	0.999988	1586	0.00199203	0.00107028	2	1313	0.00152091	+	170	176	170	175	170	178.508
L858R-sample9	6603566	6603530	0.999995	1722	0.00178147	0.00199601	3	1528	0.0019595	+	144	166/169	144	170	144	173.112
L858R-sample10	11355302	11355292	0.999999	4250	0.0261039	0.0300325	90	3532	0.0248482	+	150/157	166	166	170	178.705	173.831
L858R-sample11	12793180	12793113	0.999995	3504	0.102349	0.115533	317	2676	0.105914	|	148/167	165	167	165	181.231	167.084
L858R-sample12	12918192	12918172	0.999998	3168	0.357721	0.382166	988	1748	0.361111	+	146/164	167	167	168	173.95	171.031
L858R-sample13	8525186	8525177	0.999999	1851	0.0445545	0.0439276	80	1467	0.051713	|	148/165/176/189/199	170	171	173	180.762	176.896
L858R-sample14	8469824	8469796	0.999997	2073	0.0361507	0.0415704	66	1692	0.0375427	|	159/161/174/176	171	180	174	194.339	178.83
L858R-sample15	7453188	7453177	0.999999	1266	0.0253067	0.0334855	33	1054	0.0303588	+	159	165	169	173	187.867	176.726
L858R-sample16	6522628	6522611	0.999997	2345	0.144619	0.173738	299	1775	0.144166	+	154	167	161.5	167	175.229	169.004
L858R-sample17	6080654	6080633	0.999997	2095	0.00148148	0.000446728	7	1814	0.00384404	|	166/172	170	172	174	193.6	177.615
L858R-sample18	7722492	7722454	0.999995	1353	0.00603318	0.00383658	6	1160	0.0051458	|	171/190	173	185	174	196.667	177.221
L858R-sample19	7749238	7749171	0.999991	2109	0.00148148	0.00322266	7	1757	0.00396825	+	134	170	203.5	172	209.5	175.401
L858R-sample20	10096672	10096658	0.999999	2712	0.00402783	0.00921659	17	2255	0.00748239	|	165/193/243	171	193	170	209.75	172.405
L858R-sample21	8585718	8585711	0.999999	2580	0.0137309	0.00660282	33	2267	0.0143478	+	147	165	166	169	171.484	172.281
L858R-sample22	9595714	9595697	0.999998	1534	0.00525624	0.00673401	6	1306	0.00457317	|	149/162	161	162	172	157.4	177.158
L858R-sample23	8386588	8386528	0.999993	1652	0.0328283	0.0322581	47	1312	0.0345843	+	158/162	166	169	171	177.659	173.382
L858R-sample24	10365068	10365007	0.999994	3087	0.298543	0.317575	802	1889	0.29803	|	161/299	163	167	173	184.065	175.986
L858R-sample25	6644740	6644704	0.999995	2236	0.220696	0.26087	461	1433	0.2434	-	166	164	168	170	179.005	175.213
L858R-sample26	6965710	6965663	0.999993	2296	0.0414013	0.0682095	78	1821	0.0410742	+	153/163	170	163	169	190.117	170.778
L858R-sample27	6427646	6427621	0.999996	2080	0.0117108	0.00693383	22	1696	0.0128056	-	170	166/168	170	173	165.611	176.612
L858R-sample28	11423690	11423623	0.999994	1223	0.0669935	0.0679227	70	892	0.0727651	-	172	169	172	170	176.031	172.776
V600E-sample1	25542694	25540133	0.9999	1957	0.00302572	0.0015	2	1730	0.00115473	+	123	165	123	166	123	167.733
V600E-sample2	8028122	8028102	0.999998	1579	0.00125313	0.0005	1	1371	0.000728863	-	176	166/169	176	169	176	172.203
V600E-sample3	6527376	6527029	0.999947	1997	0.00197628	0.0016	5	1760	0.00283286	+	138/148	165	148	167	146	171.015
V600E-sample4	6366322	6366316	0.999999	1724	0.00233372	0.0017	3	1489	0.00201072	-	214	167	214	168	211.333	172.762
V600E-sample5	7543724	7543294	0.999943	1363	0.00142045	0.0022	3	1221	0.00245098	-	229	165	229	169	227.667	174.077
V600E-sample6	9012610	9012050	0.999938	1698	0.00116482	0.0004	2	1511	0.00132188	-	219	169	219	169	219	173.727
V600E-sample7	6952496	6952010	0.99993	1360	0.00149701	0.0006	2	1167	0.00171086	-	229	169	229	167	229	170.39
V600E-sample8	3089056	3089035	0.999993	1183	0.00257732	0.0031	4	1048	0.00380228	|	135/228	165	181.5	168	181.5	171.121
V600E-sample9	4497826	4497801	0.999994	1963	0.00210194	0.0004	2	1733	0.00115274	-	228	165	228	169	228	173.047
V600E-sample10	4977142	4977129	0.999997	2014	0.001001	0.0003	4	1706	0.00233918	+	151	164	151	169	160.667	173.881
V600E-sample11	6289138	6289059	0.999987	1687	0.00118133	0.0003	2	1461	0.00136705	+	149/159	168	154	172	154	174.75
V600E-sample12	7152744	7152382	0.999949	1767	0.00111794	0.0009	2	1530	0.00130548	+	147/149	165	148	167	148	171.536
V600E-sample13	7251778	7251753	0.999997	1978	0.00101626	0.0005	2	1787	0.00111794	+	149	165	149	170	149	172.619
E545K-sample1	24977486	24977381	0.999996	382	0.00247525	0.000484614	0	248	0	?	0	149	0	164	0	163.223
E545K-sample2	31317272	31314092	0.999898	2362	0.00168138	0.000563063	1	1929	0.000518135	-	203	161	203	167	203	172.067
E545K-sample3	7528332	7528310	0.999997	1649	0.00121433	0.000457307	2	1352	0.0014771	-	180/191	162	185.5	167	185.5	172.514
E545K-sample4	9697124	9697079	0.999995	1575	0.00252366	0.000543922	2	1310	0.00152439	+	146	166	146	167	146	172.845
E545K-sample5	3778864	3778823	0.999989	1685	0.216726	0.2	331	1137	0.225477	-	168	167	162.5	163	163.56	163.997
E545K-sample6	8382630	8382616	0.999998	1961	0.00152983	0.000384468	3	1678	0.00178465	+	160	169	160	169	168	172.184
E545K-sample7	8619238	8619155	0.99999	1671	0.00120773	0.000573441	2	1445	0.00138217	+	164	169	164	167	164	171.37
E545K-sample8	4046814	4046797	0.999996	2025	0.00103252	0.000409189	2	1686	0.00118483	+	166	169	166	169	166	172.311
E545K-sample9	7366666	7366591	0.99999	1735	0.00236686	0.00115808	3	1491	0.00200803	+	162	171	162	169	162	173.05
E545K-sample10	7594902	7594866	0.999995	3686	0.00135281	0.00237006	5	2509	0.00198886	+	139/142	162/167	142	162	157.2	166.033
E545K-sample11	6149502	6149490	0.999998	2611	0.00185805	0.00154233	2	2222	0.000899281	+	160	168	160	165	160	165.358
E545K-sample12	7038970	7038948	0.999997	1785	0.0388952	0.0328358	50	1460	0.0331126	+	145	164	153	166	160.522	169.81
E545K-sample13	6418376	6418348	0.999996	2059	0.00487567	0.00469615	9	1690	0.00529723	|	136/157/180	167	158.5	167	160	167.293
G12C-sample1	24821030	24776298	0.998198	1987	0.000995025	0.000364013	2	1728	0.00115607	+	146	169	146	167	146	171.061
G12C-sample2	46177702	46177459	0.999995	1176	0.0146154	0.017094	19	881	0.0211111	-	164/170/182/185/242/290/292	150	193	168	223.722	172.392
G12C-sample3	21291834	21289014	0.999868	1811	0.0507614	0.0250447	97	1548	0.0589666	+	133	169	153	166	179.685	171.712
G12C-sample4	21358138	21357438	0.999967	1084	0.0153015	0.0102389	11	948	0.0114703	+	121/131/140/146/148	163/168/172	140	165	142.182	164.478
G12C-sample5	21538936	21537626	0.999939	1521	0.00530504	0.00312812	8	1337	0.00594796	|	164/169/170	165	169	166	184.286	171.421
G12C-sample6	9378002	9377897	0.999989	2346	0.26928	0.172592	567	1537	0.269487	+	150	162	154	165	168.324	171.316
G12C-sample7	6610474	6610386	0.999987	1695	0.0355208	0.0196078	52	1185	0.0420372	+	164	165	176	168	194.98	173.573
G12C-sample8	5657632	5657612	0.999996	2081	0.338105	0.211332	657	1215	0.350962	+	164/298	164/166	166	166	184.133	171.808
G12C-sample9	7437432	7437410	0.999997	2404	0.00216169	0.00069951	4	2046	0.00195122	+	137	164	137	169	156	173.389
G12C-sample10	9416150	9416123	0.999997	2639	0.025974	0.0181992	65	2311	0.0273569	+	128/133/146	167	148	167	159.767	169.302
G12C-sample11	7671346	7671283	0.999992	2398	0.0117796	0.00968447	31	2081	0.014678	|	141/147/150/158/161/164/166/167/174/210/297	165	166	168	188.741	172.448
G12C-sample12	5921654	5921635	0.999997	1308	0.00220751	0.00152494	2	1122	0.00177936	+	171/172	174	171.5	167	171.5	171.145
G12C-sample13	6323224	6322802	0.999933	1463	0.0333787	0.0178571	26	1234	0.0206349	+	133/147	167	147	167	151.154	168.889
G12V-sample1	19308618	19307130	0.999923	2326	0.00735294	0.00299529	12	2024	0.00589391	+	141/148/157/158/163	167	157	168	163.583	171.849
G12V-sample2	24587156	24586752	0.999984	1898	0.00105541	0.000313803	2	1709	0.00116891	+	163	169	163	169	163	173.064
G12V-sample3	21291834	21289014	0.999868	1810	0.00112931	0.000635959	2	1548	0.00129032	+	167	169	167	166	167	171.689
G12V-sample4	6571388	6571374	0.999998	1786	0.0011383	0.000604616	1	1590	0.000628536	+	153	169	153	169	153	173.446
G12V-sample5	6122916	6122899	0.999997	1881	0.0125614	0.00527325	17	1630	0.0103218	+	141	166	161	167	172.062	171.308
G12V-sample6	8745736	8745718	0.999998	2016	0.00296004	0.000404461	5	1752	0.00284576	+	145/161	170	153	168	153	171.46

## Sheet: Size Selection ddPCR Validation
Sample_ID	Gene	Mutation	NGS Frequency	Result	ddPCR
					130~160 bp	160~230 bp
E545K-sample5	PIK3CA	p.E545K	0.2161	Long	0.213	0.183
G12C-sample5	KRAS	p.G12C	0.006	Other	0.0067	0.0044
G12C-sample6	KRAS	p.G12C	0.2694	Short	0.133	0.065
G12C-sample8	KRAS	p.G12C	0.3389	Short	0.245	0.291
G12V-sample1	KRAS	p.G12V	0.0074	Short	0.0009	0.00028
L858R-sample20	EGFR	p.L858R	0.00402488	Long	0.0036	0.0048
T790M-sample10	EGFR	p.T790M	0.0044	Long	0.0121	0.021
T790M-sample12	EGFR	p.T790M	0.0051	Short	0.0041	0.0072
T790M-sample17	EGFR	p.T790M	0.0054	Long	0.003	0.0104
T790M-sample30	EGFR	p.T790M	0.4453	Short	0.464	0.422
T790M-sample11	EGFR	p.T790M	0.7477	Short	0.762	0.654

## Sheet: Gene Panel Genelist
38 hotspots gene panel
AKT1	DHFR	IDH1	PIK3CA
ALK	DPYD	IDH2	RET
BRAF	EGFR	KIT	ROS1
BRCA1	ERBB2	KRAS	RRM1
BRCA2	ERCC1	MET	SMAD4
CDA	ERCC2	MTHFR	TYMS
CYP2C19	FGFR1	NOTCH1	UGT1A1
CYP2C9	FGFR2	NQO1	XRCC1
CYP2D6	GSTP1	NRAS
CYP3A4	HRAS	PDGFRA
